# Supplementary material
Source: publisher figshare collection journal article supplement (https://acs.figshare.com/ndownloader/files/5625489)
Supplement: Supplementary file 1 [file 5625489]

## Supporting Information

**Title:** A green and facile synthesis of ordered mesoporous nano-silica using coal fly ash

*Feng Yan, Jianguo Jiang, Sicong Tian, Zongwen Liu, Jeffrey Shi, Kaimin Li, Xuejing Chen and Yiwen Xu*

### 1. Experimental: Characterization

### 2. Results:

**Table S1.** Chemical composition of the coal fly ash and the synthetic nano-silica.

**Table S2.** Calculation of the Gibbs free energy for Eq. S1-S5.

**Table S3.** Weight loss, hydroxyl content and hydroxyl density of the synthetic nano-silica.

**Table S4.** Cell parameters of the synthetic nano-silica.

**Figure S1.** (a) N<sub>2</sub> physisorption isotherms and (b) pore size distributions of “FA” and “FA-desilication”.

**Figure S2.** SEM images of (a) “FA”, and (b) “FA-desilication”. Magnification factor: ×10 000 for (a-b) and ×50 000 for the Insertion of (a-b).

**Figure S3.** (a) TGA analysis and (b) FTIR spectra of “SiO<sub>2</sub>-0.00”, “SiO<sub>2</sub>-0.04”, “SiO<sub>2</sub>-0.08”, “SiO<sub>2</sub>-0.16” and “SiO<sub>2</sub>-0.32”.

**Figure S4.** XRD patterns of “SiO<sub>2</sub>-0.00”, “SiO<sub>2</sub>-0.04”, “SiO<sub>2</sub>-0.08”, “SiO<sub>2</sub>-0.16” and “SiO<sub>2</sub>-0.32”.

**Figure S5.** SEM images of (a) “SiO<sub>2</sub>-0.00”, (b) “SiO<sub>2</sub>-0.08”, (c) “SiO<sub>2</sub>-0.16” and (d) “SiO<sub>2</sub>-0.32”. Magnification factor: ×10 000 for (a-d) and ×50 000 for the Insertion of (a-d).

**Figure S6.** Particle size number distribution of “SiO<sub>2</sub>-0.00”, “SiO<sub>2</sub>-0.04”, “SiO<sub>2</sub>-0.08”, “SiO<sub>2</sub>-0.16” and “SiO<sub>2</sub>-0.32” calculated by DLS method.

# 1. Experimental

## Characterization

The mineral composition of the coal fly ash was recorded using X-ray diffraction (XRD, Rigaku D/max 2500 PC, Japan) with Cu-K $\alpha$  radiation ( $\lambda = 1.5418 \text{ \AA}$ ), and diffraction data were recorded in the  $2\theta$  range of  $10\text{-}80^\circ$  with a scanning rate of  $2^\circ \text{ min}^{-1}$ . The small-angle X-ray diffraction (SAXRD), in the  $2\theta$  range of  $0.6\text{-}5^\circ$  ( $0.5^\circ \text{ min}^{-1}$ ), was used to determine the structure of the synthetic nano-silica. Nitrogen adsorption-desorption isotherms of nanoparticles at 77 K were collected on a gas adsorption analyzer (Micrometrics Instrument, ASAP2020, America); all samples were degassed in a vacuum at  $90^\circ\text{C}$  for 1 h and at  $350^\circ\text{C}$  for 4 h before measurement. The specific surface area was calculated using the Brunauer-Emmett-Teller (BET) method over  $P/P_0 = 0.05\text{-}0.25$ , and the total pore volume was calculated from the adsorbed volume at  $P/P_0 = 0.99$ . The average pore size and pore distributions were derived from the adsorption branch of the  $\text{N}_2$  isotherm using the Barrett-Joyner-Halenda (BJH) method. The size of silica agglomerates and particle size distribution was examined using a nanoparticle size analyzer (Beckman coulter DelsaNano C, America); 0.1 wt. % silica was dispersed in ethanol by ultrasonic waves for 10 min before the measurement. The surface morphology of the samples was observed using a scanning electron microscopy (SEM, Zeiss Merlin Compact, Germany) with a 5-kV electron beam. Transmission electron microscopy (TEM) experiments were conducted on a JEOL JEM-2010F microscope (Japan) operated at 200-kV. The hydroxyl content was calculated using a Thermogravimetric Analyzer (TGA, Mettler-Toledo, TGA/DSC 2, Switzerland) from  $25^\circ\text{C}$  to  $1000^\circ\text{C}$  with a heating rate of  $10^\circ\text{C min}^{-1}$  under nitrogen gas. Fourier-transform infrared (FTIR) spectra were collected on a Fourier spectrometer (Nicolet NEXUS 870, America) using KBr pellets.

## 2. Results

**Table S1. Chemical composition of the coal fly ash and the synthetic nano-silica**

| Sample                              | SiO <sub>2</sub><br>(wt. %) | Al <sub>2</sub> O <sub>3</sub><br>(wt. %) | Fe <sub>2</sub> O <sub>3</sub><br>(wt. %) | Na <sub>2</sub> O<br>(wt. %) | CaO<br>(wt. %) | TiO <sub>2</sub><br>(wt. %) | MgO<br>(wt. %) | K <sub>2</sub> O<br>(wt. %) | Residual<br>(wt. %) |
|-------------------------------------|-----------------------------|-------------------------------------------|-------------------------------------------|------------------------------|----------------|-----------------------------|----------------|-----------------------------|---------------------|
| FA                                  | 52.00                       | 36.51                                     | 5.03                                      | 0.14                         | 2.61           | 1.80                        | 0.33           | 0.77                        | 0.81                |
| FA-5%NaOH <sup>a</sup>              | 43.39                       | 42.05                                     | 5.93                                      | 2.19                         | 3.15           | 1.97                        | 0.39           | 0.38                        | 0.55                |
| FA-15%NaOH <sup>a</sup>             | 38.86                       | 44.39                                     | 6.50                                      | 3.41                         | 3.51           | 2.10                        | 0.43           | 0.20                        | 0.60                |
| FA-25%NaOH <sup>a</sup>             | 34.80                       | 46.92                                     | 4.91                                      | 6.31                         | 3.39           | 2.44                        | 0.30           | 0.10                        | 0.83                |
| FA-35%NaOH <sup>a</sup>             | 39.35                       | 38.40                                     | 6.63                                      | 9.50                         | 3.07           | 1.84                        | 0.37           | 0.24                        | 0.60                |
| FA-50°C <sup>b</sup>                | 47.24                       | 39.78                                     | 5.38                                      | 0.69                         | 2.99           | 2.14                        | 0.29           | 0.82                        | 0.67                |
| FA-70°C <sup>b</sup>                | 43.61                       | 42.87                                     | 5.62                                      | 0.92                         | 3.03           | 2.32                        | 0.27           | 0.67                        | 0.69                |
| FA-90°C <sup>b</sup>                | 39.37                       | 43.69                                     | 5.94                                      | 3.29                         | 3.59           | 2.57                        | 0.37           | 0.33                        | 0.85                |
| FA-110°C <sup>b</sup>               | 34.80                       | 46.92                                     | 4.91                                      | 6.31                         | 3.39           | 2.44                        | 0.30           | 0.10                        | 0.83                |
| FA-130°C <sup>b</sup>               | 35.22                       | 45.46                                     | 5.04                                      | 7.22                         | 3.44           | 2.38                        | 0.32           | 0.12                        | 0.80                |
| SiO <sub>2</sub> -once <sup>c</sup> | 98.35                       | 1.00                                      | 0.12                                      | 0.25                         | 0.01           | N.D. <sup>d</sup>           | N.D.           | 0.16                        | 0.11                |
| SiO <sub>2</sub> -0.00              | 99.29                       | 0.18                                      | 0.05                                      | 0.28                         | 0.06           | N.D.                        | N.D.           | 0.10                        | 0.04                |

<sup>a</sup> The coal fly ash after desilication, the reaction conditions were same with Figure 1b. <sup>b</sup> The coal fly ash after desilication, the reaction conditions were same with Figure 2b. <sup>c</sup> “SiO<sub>2</sub>-once” was synthesized via once carbonation while the other conditions were same with “SiO<sub>2</sub>-0.00”. <sup>d</sup> N.D., not detected.

**Table S2. Calculation of the Gibbs free energy for Eq. S1-S5**

| Equation | $\Delta H^\ominus_{(298.15\text{ K})}$<br>(kJ mol <sup>-1</sup> ) | $\Delta G^\ominus_{(298.15\text{ K})}$<br>(kJ mol <sup>-1</sup> ) | $\Delta G_{(323.15\text{ K})}$<br>(kJ mol <sup>-1</sup> ) | $\Delta G_{(343.15\text{ K})}$<br>(kJ mol <sup>-1</sup> ) | $\Delta G_{(363.15\text{ K})}$<br>(kJ mol <sup>-1</sup> ) | $\Delta G_{(383.15\text{ K})}$<br>(kJ mol <sup>-1</sup> ) | $\Delta G_{(403.15\text{ K})}$<br>(kJ mol <sup>-1</sup> ) |
|----------|-------------------------------------------------------------------|-------------------------------------------------------------------|-----------------------------------------------------------|-----------------------------------------------------------|-----------------------------------------------------------|-----------------------------------------------------------|-----------------------------------------------------------|
| Eq. S1   | 37.54                                                             | -61.46                                                            | -70.14                                                    | -77.59                                                    | -85.48                                                    | -93.77                                                    | -102.45                                                   |
| Eq. S2   | 44.75                                                             | -55.79                                                            | -64.60                                                    | -72.15                                                    | -80.14                                                    | -88.54                                                    | -97.32                                                    |
| Eq. S3   | -11.78                                                            | -2.32                                                             | -1.71                                                     | -1.47                                                     | -1.44                                                     | -1.60                                                     | -1.95                                                     |
| Eq. S4   | 24.86                                                             | 322.93                                                            | 346.63                                                    | 363.80                                                    | 379.50                                                    | 393.80                                                    | 406.76                                                    |
| Eq. S5   | -324.48                                                           | -559.14                                                           | -577.41                                                   | -590.10                                                   | -601.19                                                   | -610.76                                                   | -618.90                                                   |

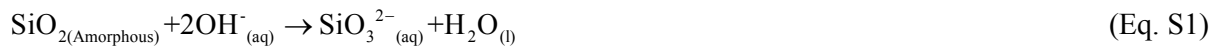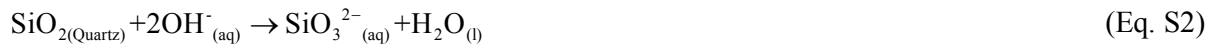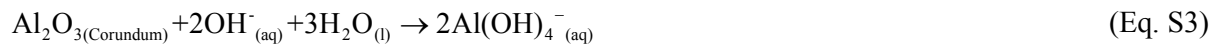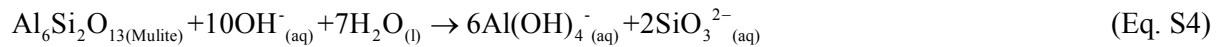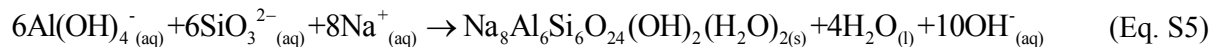

**Table S3. Weight loss, hydroxyl content and hydroxyl density of the synthetic nano-silica**

| Sample                 | Weight loss (wt. %) |           |            |       | $N_{OH}^a$<br>(mmol g <sup>-1</sup> ) | $C_{OH}^b$<br>(OH nm <sup>-2</sup> ) |
|------------------------|---------------------|-----------|------------|-------|---------------------------------------|--------------------------------------|
|                        | 25-200°C            | 200-600°C | 600-1000°C | Total |                                       |                                      |
| SiO <sub>2</sub> -0.00 | 2.91                | 4.02      | 0.63       | 7.55  | 5.16                                  | 10.75                                |
| SiO <sub>2</sub> -0.04 | 1.93                | 0.83      | 0.96       | 3.72  | 1.99                                  | 2.97                                 |
| SiO <sub>2</sub> -0.08 | 1.03                | 0.57      | 1.85       | 3.44  | 2.68                                  | 2.04                                 |
| SiO <sub>2</sub> -0.16 | 0.59                | 0.34      | 1.88       | 2.80  | 2.46                                  | 1.28                                 |
| SiO <sub>2</sub> -0.32 | 0.92                | 0.26      | 1.76       | 2.95  | 2.25                                  | 1.28                                 |

<sup>a</sup>  $N_{OH}$ , hydroxyl content; <sup>b</sup>  $C_{OH}$ , hydroxyl density.

**Table S4. Cell parameters of the synthetic nano-silica**

| Sample                 | $2\theta_{100}$ (°) | $2\theta_{110}$ (°) | $2\theta_{200}$ (°) | $d_{100}$ (Å) <sup>a</sup> | $d_{110}$ (Å) | $d_{200}$ (Å) | $a_0$ (nm) <sup>b</sup> |
|------------------------|---------------------|---------------------|---------------------|----------------------------|---------------|---------------|-------------------------|
| SiO <sub>2</sub> -0.00 | N.A. <sup>c</sup>   | N.A.                | N.A.                | N.A.                       | N.A.          | N.A.          | N.A.                    |
| SiO <sub>2</sub> -0.04 | 2.580               | 4.379               | N.D.                | 34.21                      | 20.16         | N.D.          | 3.95                    |
| SiO <sub>2</sub> -0.08 | 2.480               | 4.261               | N.D.                | 35.59                      | 20.72         | N.D.          | 4.11                    |
| SiO <sub>2</sub> -0.16 | 2.370               | 4.020               | 4.639               | 37.25                      | 21.96         | 19.03         | 4.30                    |
| SiO <sub>2</sub> -0.32 | 2.361               | 4.039               | 4.639               | 37.39                      | 21.86         | 19.03         | 4.32                    |

<sup>a</sup>  $d_{100}$ , interplanar spacing of the (1 0 0) reflection, which was obtained from the diffraction peak (1 0 0) by the Bragg's Law,  $2 \times d_{100} \times \sin \theta_{100} = \lambda$ ; <sup>b</sup>  $a_0$ , hexagonal unit cell parameter, which is calculated by  $a_0 = 2 \times d_{100} / \sqrt{3}$ ;

<sup>c</sup> N.A., not available.

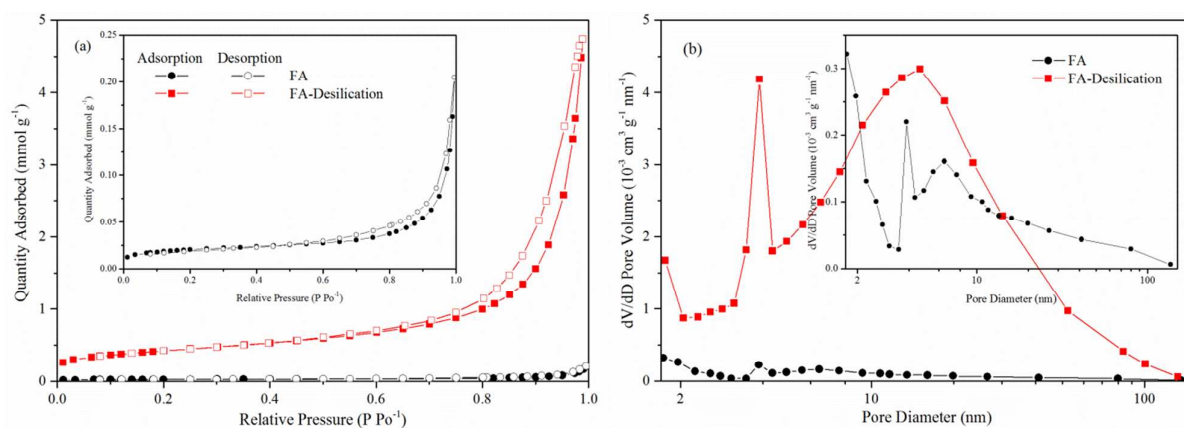

**Figure S1.** (a) N<sub>2</sub> physisorption isotherms and (b) pore size distributions of “FA” and “FA-desilication”.

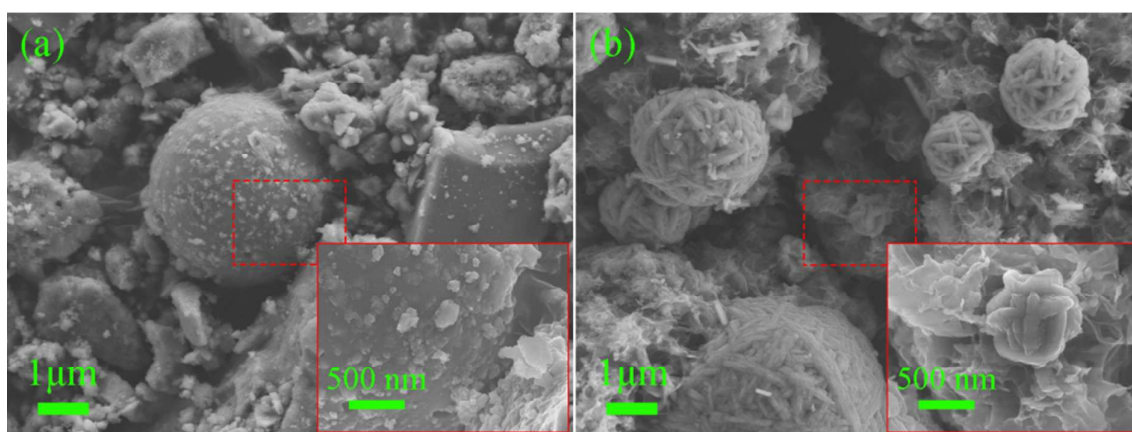

**Figure S2.** SEM images of (a) “FA”, and (b) “FA-desilication”. Magnification factor: ×10 000 for (a-b) and ×50 000 for the Insertion of (a-b).

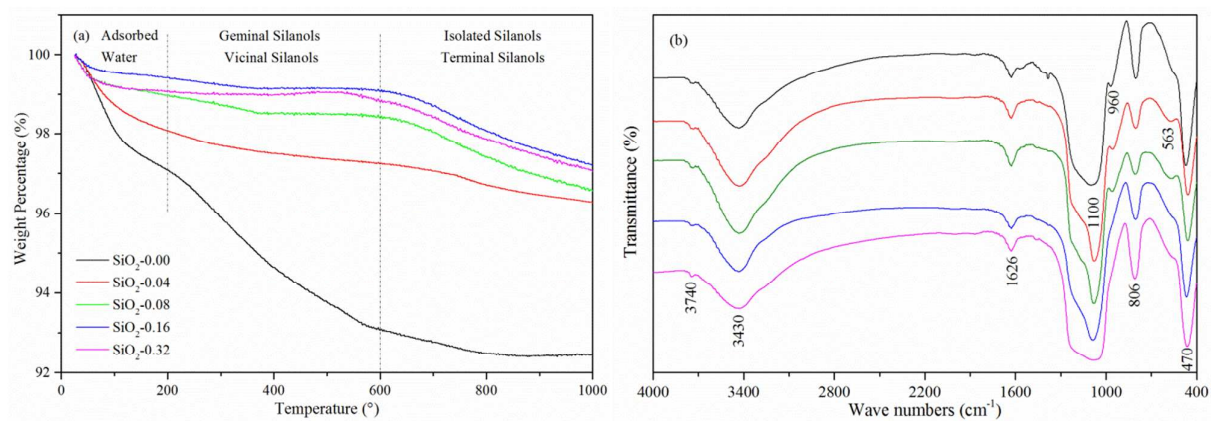

**Figure S3.** (a) TGA analysis and (b) FTIR spectra of “SiO<sub>2</sub>-0.00”, “SiO<sub>2</sub>-0.04”, “SiO<sub>2</sub>-0.08”, “SiO<sub>2</sub>-0.16” and “SiO<sub>2</sub>-0.32”.

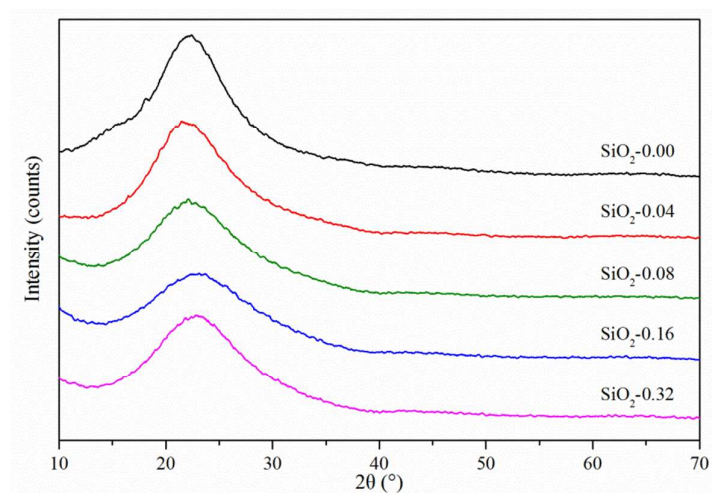

**Figure S4.** XRD patterns of “SiO<sub>2</sub>-0.00”, “SiO<sub>2</sub>-0.04”, “SiO<sub>2</sub>-0.08”, “SiO<sub>2</sub>-0.16” and “SiO<sub>2</sub>-0.32”.

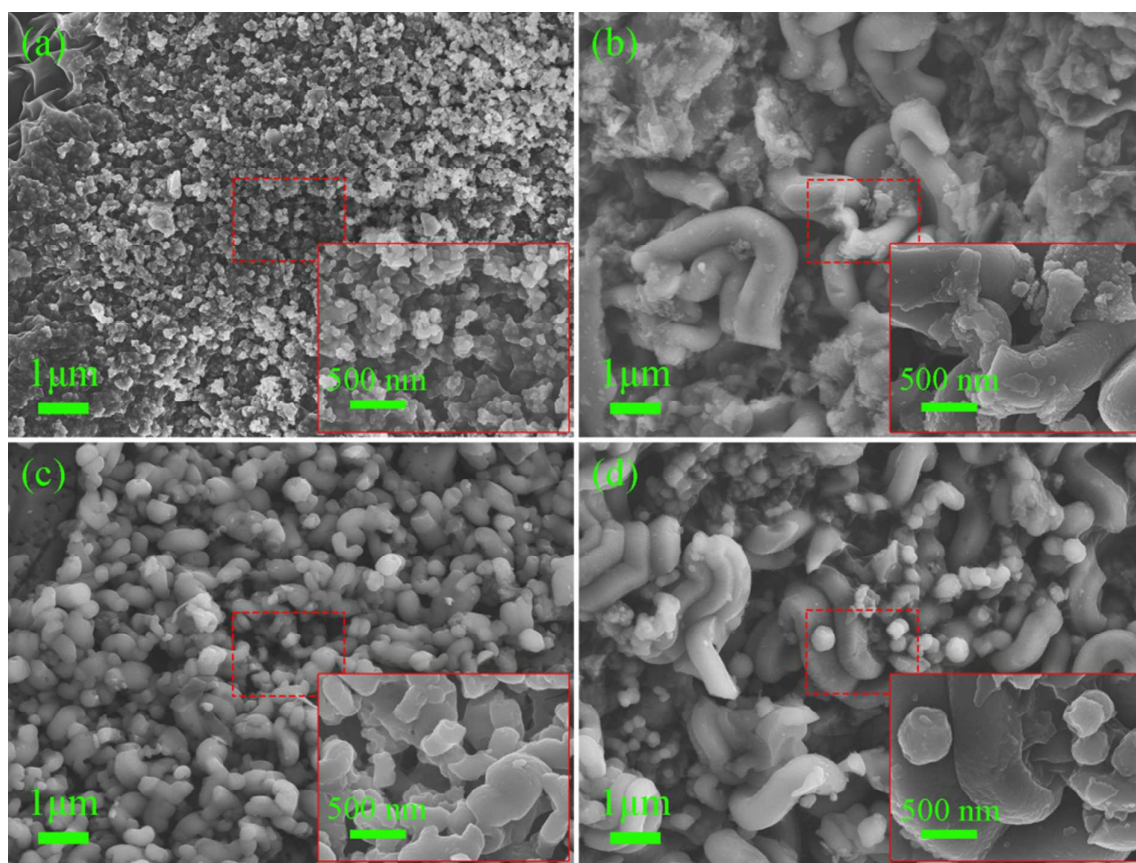

**Figure S5.** SEM images of (a) “SiO<sub>2</sub>-0.00”, (b) “SiO<sub>2</sub>-0.08”, (c) “SiO<sub>2</sub>-0.16” and (d) “SiO<sub>2</sub>-0.32”. Magnification factor: ×10 000 for (a-d) and ×50 000 for the Insertion of (a-d).

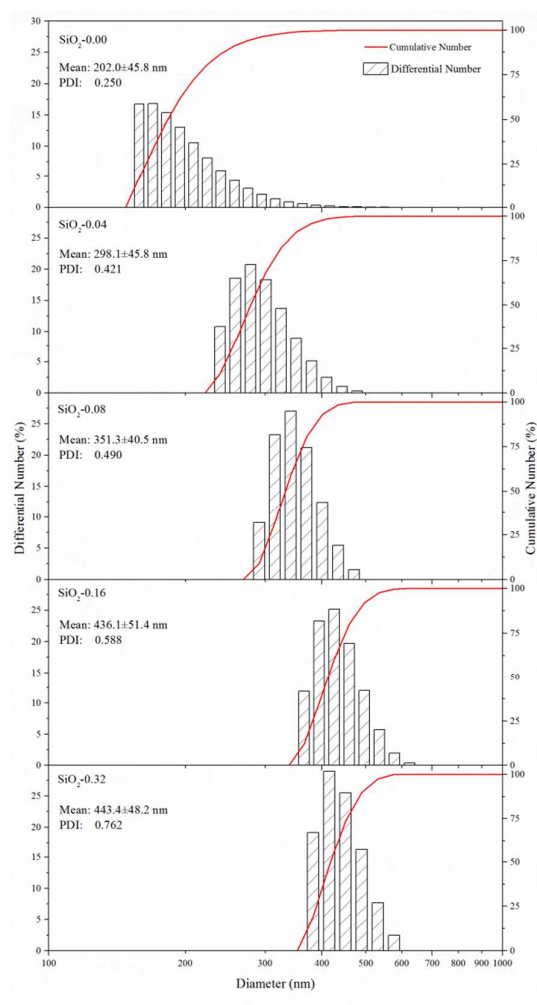

**Figure S6.** Particle size number distribution of “SiO<sub>2</sub>-0.00”, “SiO<sub>2</sub>-0.04”, “SiO<sub>2</sub>-0.08”, “SiO<sub>2</sub>-0.16”, and “SiO<sub>2</sub>-0.32” calculated by DLS method.
